# Supplementary material for: A comprehensive comparison of bacterial and fungal aerobic granules: formation, properties, surface modification, and biosorption of metals
Source: Royal Society of Chemistry journal article supplement (doi:10.1039/c5ra20103a), 2015-01-01
Supplement: c5ra20103a1.pdf [file c5ra20103a1.pdf]

Table S1 Contents of some common metals in the granules before and after Fe(III) modification, determined by ICP-AES from digested and acid-dissolved granules.

|           | <b>K</b> | <b>Na</b> | <b>Ca</b> | <b>Mg</b> | <b>Fe</b> | <b>Fe content<br/>(mg mg<sup>-1</sup>)</b> | <b>reference</b> |
|-----------|----------|-----------|-----------|-----------|-----------|--------------------------------------------|------------------|
| OAGS-B    | 0.26%    | 0.07%     | 8.8%      | 0.74%     | 0.11%     | 0.0011                                     | <b>1</b>         |
| Fe-MAGS-B | 0.003%   | 0.002%    | 0.02%     | 0.004%    | 5.9%      | 0.059                                      |                  |
| OAGS-F    | 2.5%     | 0.09%     | 0.05%     | 0.23%     | 0.06%     | 0.0006                                     | <b>2</b>         |
| Fe-MAGS-F | 0.04%    | 0.01%     | 0.01%     | 0.004%    | 1.6%      | 0.016                                      |                  |

Table S2 Comparison of two kinetic models at different Sb(V) initial concentrations (T: 35 °C, shake speed: 175 rpm, pH: 3.4, biomass dosage: 0.4 g L<sup>-1</sup>).

| MAGS | $C_0$<br>(mg L <sup>-1</sup> ) | $q_{e,exp}$<br>(mg g <sup>-1</sup> ) | Pseudo-first-order*                   |                                              |       | Pseudo-second-order**                 |                                                                 |                                                |                    |       | Reference     |
|------|--------------------------------|--------------------------------------|---------------------------------------|----------------------------------------------|-------|---------------------------------------|-----------------------------------------------------------------|------------------------------------------------|--------------------|-------|---------------|
|      |                                |                                      | $q_{e,calc}$<br>(mg g <sup>-1</sup> ) | $k_1 \times 10^{-2}$<br>(min <sup>-1</sup> ) | $r^2$ | $q_{e,calc}$<br>(mg g <sup>-1</sup> ) | $k_2 \times 10^{-3}$<br>(g mg <sup>-1</sup> min <sup>-1</sup> ) | $h$<br>(mg g <sup>-1</sup> min <sup>-1</sup> ) | $t_{1/2}$<br>(min) | $r^2$ |               |
|      |                                |                                      |                                       |                                              |       |                                       |                                                                 |                                                |                    |       |               |
| MAGS | 20                             | 33.9                                 | 15.9                                  | 2.3                                          | 0.909 | 35.7                                  | 4.75                                                            | 6.1                                            | 5.9                | 0.999 | Present study |
| -F   | 60                             | 85.9                                 | 32.3                                  | 1.9                                          | 0.869 | 90.9                                  | 2.28                                                            | 18.8                                           | 4.8                | 0.999 |               |
|      | 100                            | 130                                  | 54.8                                  | 1.8                                          | 0.900 | 142                                   | 1.11                                                            | 22.4                                           | 6.3                | 0.999 |               |
| MAGS | 20                             | 36.6                                 | 23.9                                  | 1.7                                          | 0.902 | 38.5                                  | 1.67                                                            | 2.5                                            | 15.6               | 0.999 | <b>1</b>      |
| -B   | 60                             | 102                                  | 67.8                                  | 1.5                                          | 0.944 | 111                                   | 0.52                                                            | 6.4                                            | 17.3               | 0.999 |               |
|      | 100                            | 146                                  | 97.7                                  | 1.3                                          | 0.920 | 167                                   | 0.30                                                            | 8.4                                            | 20                 | 0.998 |               |

\* Model equation:  $\ln(q_e - q_t) = \ln q_e - k_1 t$ , where  $q_e$  (mg g<sup>-1</sup>) and  $q_t$  (mg g<sup>-1</sup>) represent the amounts of the Sb(V) absorbed at equilibrium and at time  $t$  (min), respectively, and  $k_1$  is the rate constants (min<sup>-1</sup>).<sup>3</sup>

\*\* Model equation:  $t/q_t = 1/k_2 q_e^2 + t/q_e$ , where  $k_2$  is the rate constants (min<sup>-1</sup>). The initial sorption rate can be calculated as  $h = k_2 q_e^2$ , and half-adsorption time as  $t_{1/2} = 1/k_2 q_e$ .<sup>4</sup>

Table S3 Isotherm model parameters for the biosorption of Sb(V) onto the modified granules (T: 35 °C, shake speed: 175 rpm, pH: 3.4, biomass dosage: 1 g L<sup>-1</sup>).

| MAGS   | Langmuir model* |                           |       | Freundlich model**          |     |       | reference |
|--------|-----------------|---------------------------|-------|-----------------------------|-----|-------|-----------|
|        | $q_m$           | $b$ (L mg <sup>-1</sup> ) | $r^2$ | $k_F$ (mg g <sup>-1</sup> ) | $n$ | $r^2$ |           |
| MAGS-B | 125             | 0.056                     | 0.987 | 27.1                        | 3.9 | 0.963 | <b>5</b>  |
| MAGS-F | 111             | 0.112                     | 0.997 | 24.3                        | 3.3 | 0.957 | <b>2</b>  |

\* Model equation:  $C_e/q_e = C_e/q_m + 1/(bq_m)$ , where  $C_e$  represents the Sb(V) equilibrium concentration (mg L<sup>-1</sup>),  $q_e$  is the equilibrium adsorption quantity (mg g<sup>-1</sup>),  $q_m$  is the maximum monolayer adsorption quantity (mg g<sup>-1</sup>), and  $b$  is the Langmuir constant (L mg<sup>-1</sup>).<sup>6</sup>

\*\* Model equation:  $\ln q_e = 1/n \ln C_e + \ln k_F$ , where  $k_F$  is the Freundlich constant (mg g<sup>-1</sup>), and  $1/n$  is related to the adsorption intensity of the adsorbent.<sup>7</sup>

Table S4 Thermodynamic model parameters for the biosorption of Sb(V) onto the modified granules,\* (pH: 3.4, shake speed: 175 rpm, biomass dosage: 0.4 g L<sup>-1</sup>).

| <i>T</i> (°C) | $\Delta G$              |        | $\Delta H$              |        | $\Delta S$                              |        |
|---------------|-------------------------|--------|-------------------------|--------|-----------------------------------------|--------|
|               | (kJ mol <sup>-1</sup> ) |        | (kJ mol <sup>-1</sup> ) |        | (J mol <sup>-1</sup> ·K <sup>-1</sup> ) |        |
|               | MAGS-B**                | MAGS-F | MAGS-B                  | MAGS-F | MAGS-B                                  | MAGS-F |
| 10            | -4.87                   | -6.52  |                         |        |                                         |        |
| 25            | -5.98                   | -7.68  |                         |        |                                         |        |
| 35            | -6.72                   | -8.45  | 16.1                    | 15.3   | 74.1                                    | 77.1   |
| 45            | -7.46                   | -9.22  |                         |        |                                         |        |

\*The thermodynamic parameters including entropy ( $\Delta S$ ), enthalpy( $\Delta H$ ), and the Gibbs free energy ( $\Delta G$ ) obtained as:  $\Delta G = -RT\ln K$ ,  $K = q_e/C_e$ ,  $\Delta G = \Delta H - T\Delta S$ , where R represents the ideal gas constant,  $8.314 \times 10^{-3}$  kJ mol<sup>-1</sup> K<sup>-1</sup>, T is the absolute temperature (K), and the distribution coefficient is expressed as K, which is the ratio of equilibrium adsorption quantity to the equilibrium concentration of Sb(V).<sup>8</sup>

\*\*The data of MAGS-B are cited from Wang et al.<sup>5</sup>

Table S5 A systematic comparison of various parameters between bacterial granules (BG) and fungal granules (FG).

|                                           | Characteristics                                          | Bacterial granules                                                                                                              | Fungal granules                                                                                                               |
|-------------------------------------------|----------------------------------------------------------|---------------------------------------------------------------------------------------------------------------------------------|-------------------------------------------------------------------------------------------------------------------------------|
| <b>Formation process</b>                  | <b>Difference in culture media</b>                       | KH <sub>2</sub> PO <sub>4</sub> 0.66 g L <sup>-1</sup><br>peptone 0.4 g L <sup>-1</sup><br>yeast extract 0.25 g L <sup>-1</sup> | KH <sub>2</sub> PO <sub>4</sub> 0.20 g L <sup>-1</sup><br>peptone 0.04 g L <sup>-1</sup><br>yeast extract 0 g L <sup>-1</sup> |
|                                           | <b>Carbon source</b>                                     | sodium acetate +<br>sodium propionate                                                                                           | glucose                                                                                                                       |
|                                           | <b>Influent COD conc.</b>                                | 1000~3000 mg L <sup>-1</sup>                                                                                                    | 1000 mg L <sup>-1</sup>                                                                                                       |
|                                           | <b>Settling time</b>                                     | 30 to 1 min                                                                                                                     | 5 min                                                                                                                         |
|                                           | <b>Culturing time</b>                                    | 20 days                                                                                                                         | 5 days                                                                                                                        |
|                                           | <b>pH change in one cycle</b>                            | 7 to 8.5                                                                                                                        | 7 to 4.5                                                                                                                      |
|                                           | <b>Original granules</b>                                 | <b>Size</b>                                                                                                                     | 3-5 mm                                                                                                                        |
| <b>Color</b>                              |                                                          | light yellow                                                                                                                    | white                                                                                                                         |
| <b>SVI</b>                                |                                                          | 48 mL g <sup>-1</sup>                                                                                                           | 74 mL g <sup>-1</sup>                                                                                                         |
| <b>Settling speed</b>                     |                                                          | 5.6 cm s <sup>-1</sup>                                                                                                          | 2.5 cm s <sup>-1</sup>                                                                                                        |
| <b>Moisture content</b>                   |                                                          | 92%                                                                                                                             | 93%                                                                                                                           |
| <b>Ash content</b>                        |                                                          | 24%                                                                                                                             | 5.2%                                                                                                                          |
| <b>Fe concentration</b>                   |                                                          | 0.0011 mg mg <sup>-1</sup>                                                                                                      | 0.0006 mg mg <sup>-1</sup>                                                                                                    |
| <b>Specific surface area</b>              |                                                          | 65.4 m <sup>2</sup> g <sup>-1</sup>                                                                                             | 9.1 m <sup>2</sup> g <sup>-1</sup>                                                                                            |
| <b>Pore volume</b>                        |                                                          | 0.196 mL g <sup>-1</sup>                                                                                                        | 0.021 mL g <sup>-1</sup>                                                                                                      |
| <b>Pore size</b>                          |                                                          | 12.38 nm                                                                                                                        | 10.81 nm                                                                                                                      |
| <b>Cation adsorption</b>                  |                                                          | Bacterial better than fungal, pH 3.4~7.6 similar,<br>1.9/2.6 bad performance                                                    |                                                                                                                               |
| <b>Sb(V) adsorption</b>                   |                                                          | bad performance regardless of pH                                                                                                |                                                                                                                               |
| <b>Modified granules</b>                  |                                                          | <b>Color</b>                                                                                                                    | brown                                                                                                                         |
|                                           | <b>Fe concentration</b>                                  | 0.059 mg mg <sup>-1</sup>                                                                                                       | 0.016 mg mg <sup>-1</sup>                                                                                                     |
|                                           | <b>Specific surface area</b>                             | 8.52 m <sup>2</sup> g <sup>-1</sup>                                                                                             | 29.7 m <sup>2</sup> g <sup>-1</sup>                                                                                           |
|                                           | <b>Pore volume</b>                                       | 0.029 mL g <sup>-1</sup>                                                                                                        | 0.054 mL g <sup>-1</sup>                                                                                                      |
|                                           | <b>Pore size</b>                                         | 14.81 nm                                                                                                                        | 6.97 nm                                                                                                                       |
|                                           | <b>Stability at high pH</b>                              | poor                                                                                                                            | good                                                                                                                          |
| <b>Sb(V) removal by modified granules</b> | <b>Kinetic model</b>                                     | Pseudo-second-order describes best                                                                                              |                                                                                                                               |
|                                           | <b>Initial rate (mg g<sup>-1</sup>min<sup>-1</sup>)</b>  | 2.5~8.4                                                                                                                         | 6.1~22                                                                                                                        |
|                                           | <b>Rate constant (g mg<sup>-1</sup>min<sup>-1</sup>)</b> | 0.0003~0.00167                                                                                                                  | 0.00111~0.00475                                                                                                               |
|                                           | <b>Half adsorption time</b>                              | 15.6~20 min                                                                                                                     | 4.8~6.3 min                                                                                                                   |
|                                           | <b>Isotherm</b>                                          | Langmuir describes better                                                                                                       |                                                                                                                               |
|                                           | <b>Maximum adsorption capacity</b>                       | 125 mg g <sup>-1</sup>                                                                                                          | 111 mg g <sup>-1</sup>                                                                                                        |
|                                           | <b>Thermodynamics</b>                                    | Spontaneous adsorption (10~45°C)                                                                                                |                                                                                                                               |
|                                           | <b>ΔH</b>                                                | 16.1 kJ mol <sup>-1</sup>                                                                                                       | 15.3 kJ mol <sup>-1</sup>                                                                                                     |
| <b>ΔS</b>                                 | 74.1 J mol <sup>-1</sup> ·K <sup>-1</sup>                | 77.1 J mol <sup>-1</sup> ·K <sup>-1</sup>                                                                                       |                                                                                                                               |

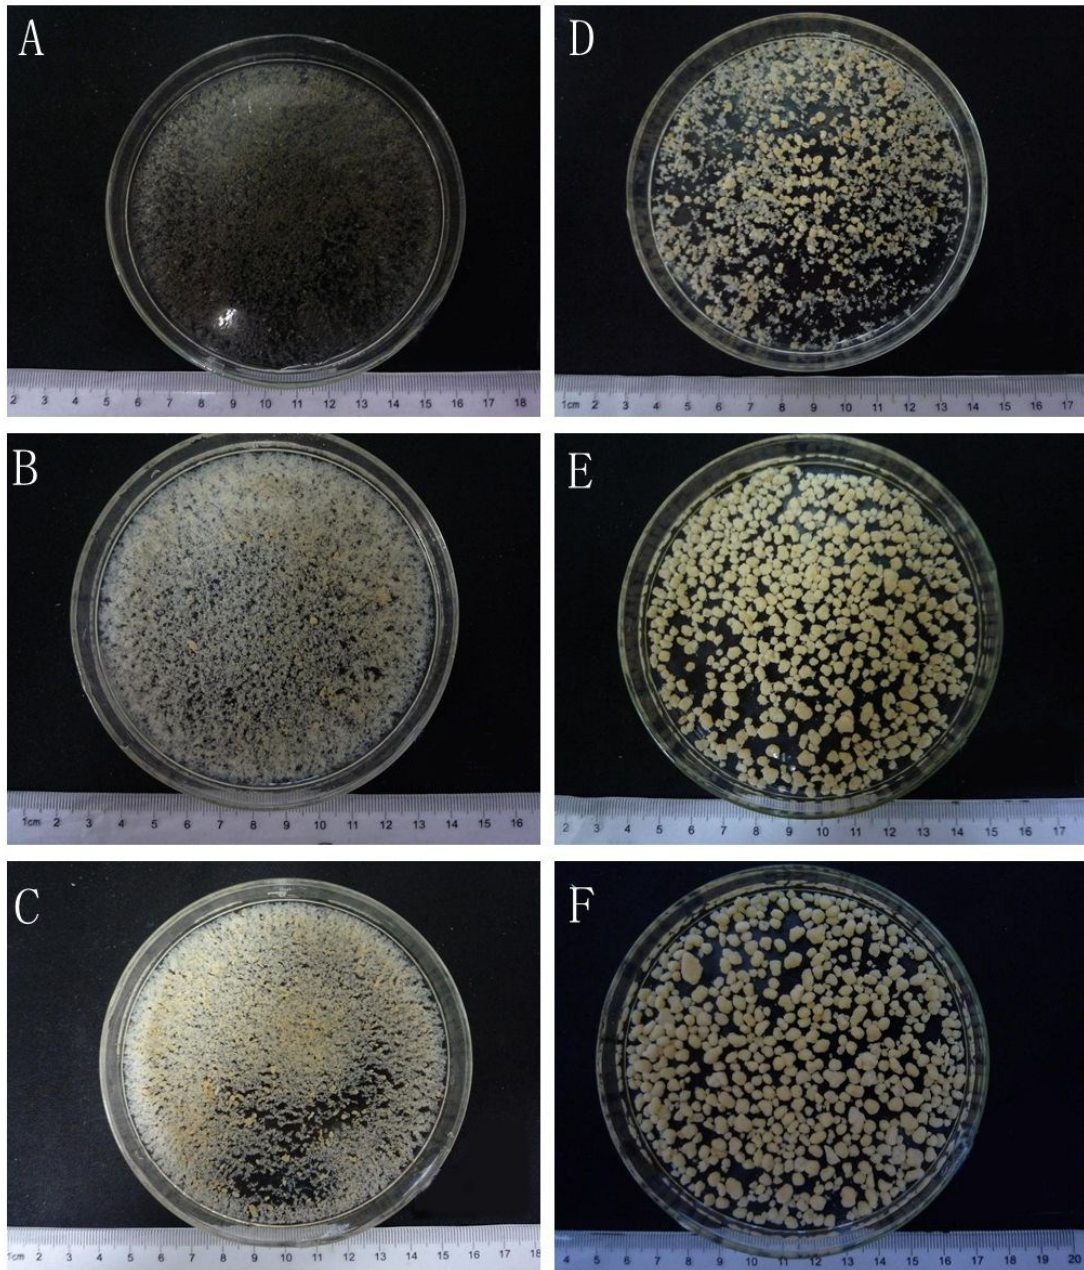

Fig. S1 Biomass morphology change during formation of bacterial granules. (A) day 1 (B) day 4 (C) day 6 (D) day11 (E) day18 (F) day20.

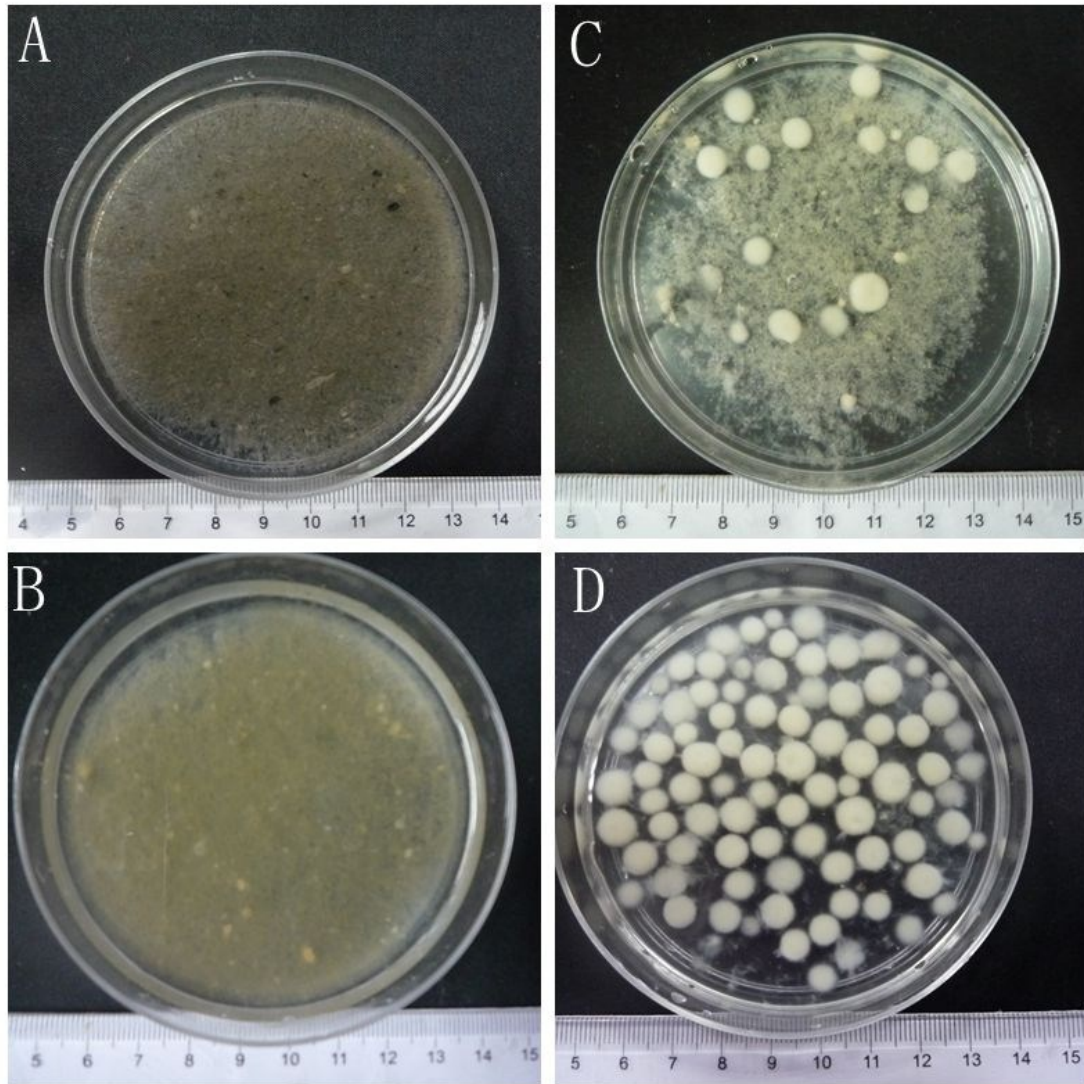

Fig. S2 Biomass morphology change during formation of fungal granules. (A) day 1 (B) day 2 (C) day 3 (D) day 5.



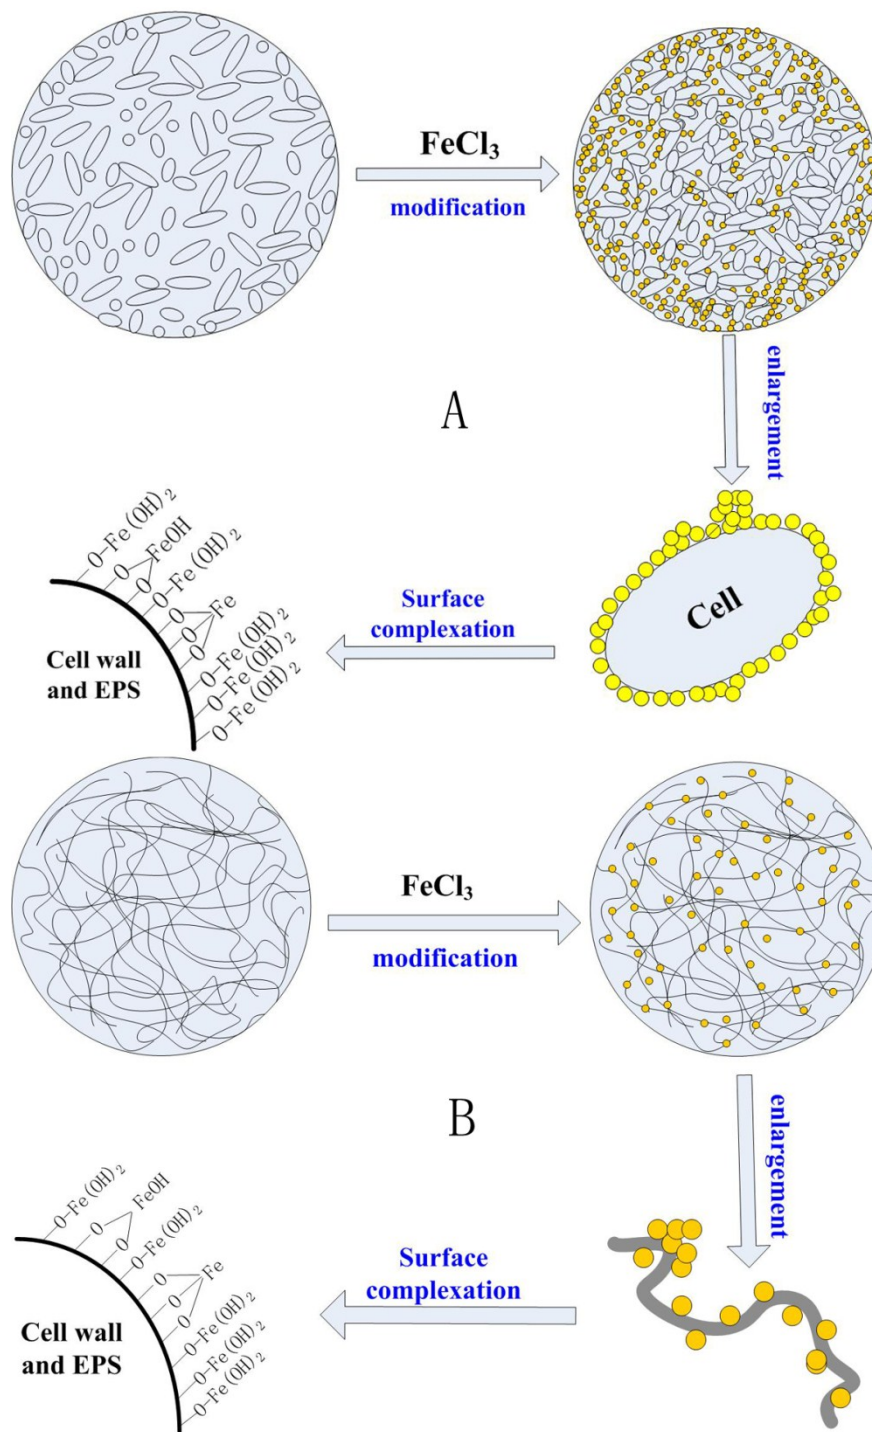

Fig. S3 Proposed mechanisms of Fe(III) modification on aerobic granules. (A) bacterial granules; (B) fungal granules.



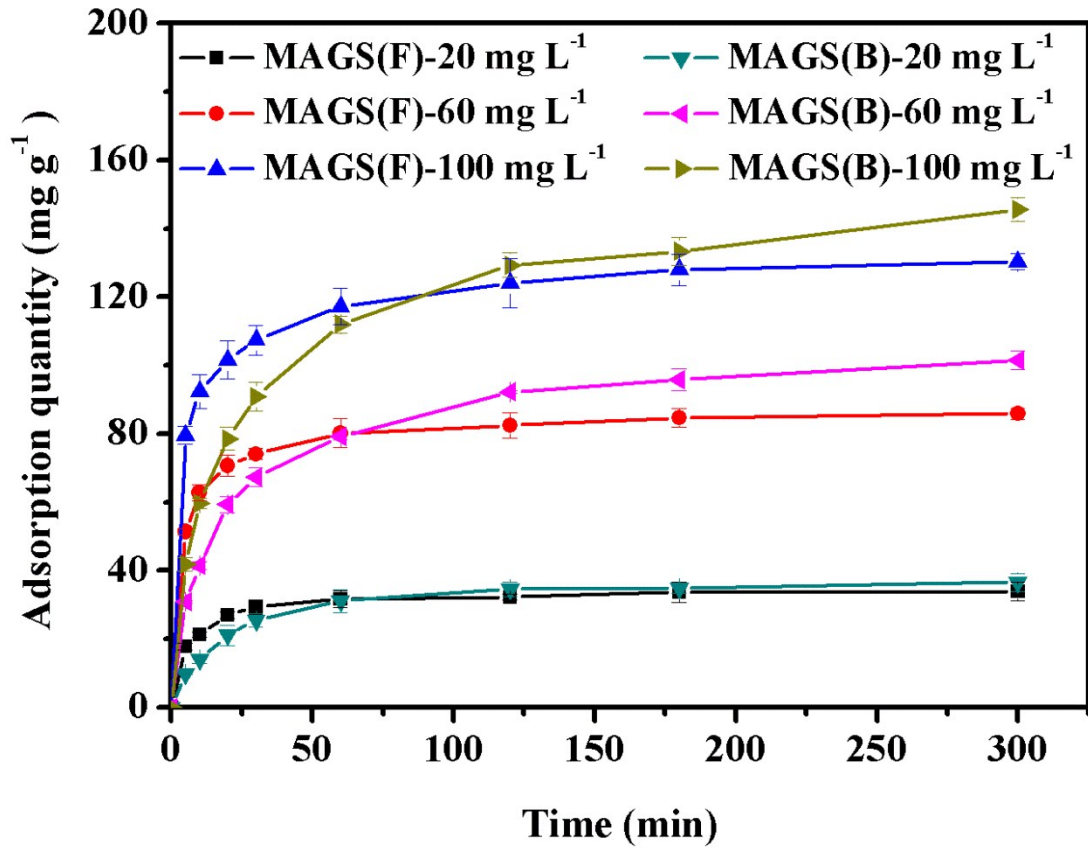

Fig. S4 Effect of initial concentrations and contact time on Sb(V) removal by modified granules, (T: 35 °C, shaking speed: 175 rpm, pH 3.4, biomass dosage: 0.4 g L<sup>-1</sup>).

## References:

1. L. Wang, C. Wan, D. J. Lee, X. Liu, Y. Zhang, X. F. Chen and J. H. Tay, *Bioresource Technol.*, 2014, **158**, 351–354.
2. C. Wan, L. Wang, D. J. Lee, Q. Zhang, J. Li and X. Liu, *J. Taiwan Inst. Chem. E.*, 2014, **45**, 2610–2614.
3. S. Lagergren, *K. Sven. Vetenskapsakad. Handl.*, 1898, **24**, 1–39.
4. Y. S. Ho and G. McKay, *Process Biochem.*, 1999, **34**, 451–465.
5. L. Wang, C. Wan, Y. Zhang, D. J. Lee, X. Liu, X. F. Chen and J. H. Tay, *J. Hazard. Mater.*, 2015, **284**, 43–49.
6. I. Langmuir, *J. Am. Chem. Soc.*, 1918, **40**, 1361–1403.
7. H. Freundlich, *Z. Phys. Chem.*, 1906, **57**.
8. D. Ozdes, C. Duran and H. B. Senturk, *J. Environ. Manage.*, 2011, **92**, 3082–3090.
